# Supplementary material for: Relevant and unprecedented C–H/σ supramolecular interactions involving σ-aromatic M2X2cores
Source: Royal Society of Chemistry journal article supplement (doi:10.1039/c3dt52162a), 2014-01-01
Supplement: c3dt52162a1.pdf [file c3dt52162a1.pdf]

## Relevant and unprecedented C-H/ $\sigma$ supramolecular interactions involving $\sigma$ -aromatic $M_2X_2$ cores

Ashok Sasmal, Antonio Bauzá, Antonio Frontera, Corrado Rizzoli, Cédric Desplanches,  
Loïc J. Charbonnière, Samiran Mitra

### Supporting Information

#### DFT studies of some relevant complexes

In order to complement the computational study described above characterizing the C-H/ $\sigma$  interaction, we have analyzed previously reported X-ray crystal structures where this interaction is present but not noticed by the original authors. In particular we have selected three examples that clearly illustrate the role of this novel noncovalent interaction in the crystal packing phenomena. The first work was reported by Jes and coworkers,<sup>69</sup> who synthesized a series of different coordination polymers based on a binuclear copper (I) complex and 2,3-dimethylpyrazine ligand, using Cl, Br and I as counter-ions. Among several noncovalent interactions, the C-H/ $\sigma$  interaction also influences the final solid state structure and it is established between a methyl group of a pyrazine moiety of the ligand and the binuclear copper (I) core ( $Cu_2I_2$ ) as can be observed in Figure S1, where a fragment of the polymer is represented. The theoretical model used to evaluate the C-H/ $\sigma$  interaction is also shown.

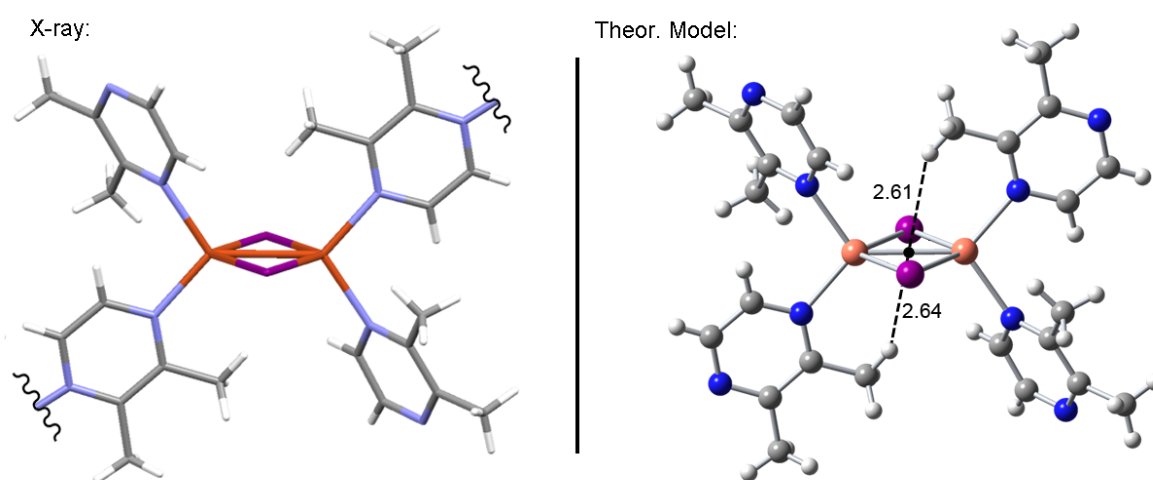

**Figure S1.** Left: Partial view of the X-ray structure of the coordination polymer reported by Jes and coworkers<sup>69</sup> (only the monomer is shown). Right: Theoretical model (right) used to study the CH/ $\sigma$  interaction observed in the X-ray structure. Distances (in Å) are measured to the ring centroid.

The theoretical model has been used in order to keep a compromise between the size of the system and the computational demands and, moreover, to be able to evaluate the interaction using ligand inter-exchange equations (see Figure S2), as has been previously used in compound 2 (see Figure 12). That is, using the first (top) reaction, we have evaluated the reaction energy upon changing one 1,2-dimethylpyrazine ( $\text{Me}_2\text{Pyz}$ ) by a pyrazine ( $\text{Pyz}$ ) ligand, denoted as  $\Delta E_1$  (one of the C–H/ $\sigma$  interactions). Using the second equation ( $\Delta E_2$ ) we measure both C–H/ $\sigma$  interactions allowing us to evaluate possible cooperativity effects by comparison to  $\Delta E_1$ . The variation energy for the first equation ( $\Delta E_1$ ) is 5.0 kcal/mol, indicating that the complex with  $\text{Me}_2\text{Pyz}$  ligand is more favorable than that with  $\text{Pyz}$ , where the interaction is not formed. Therefore a single C–H/ $\sigma$  interaction in this system is approximately -5.0 kcal/mol, which is in reasonably agreement with the energetic value obtained in the preliminary study (complex **15**, Table 4). The computed value for  $\Delta E_2$  where two simultaneous C–H/ $\sigma$  interactions are evaluated is 10 kcal/mol. This value is exactly twice the  $\Delta E_1$  energy, indicating that the interaction is additive in this complex and, consequently, cooperativity effects are not present.

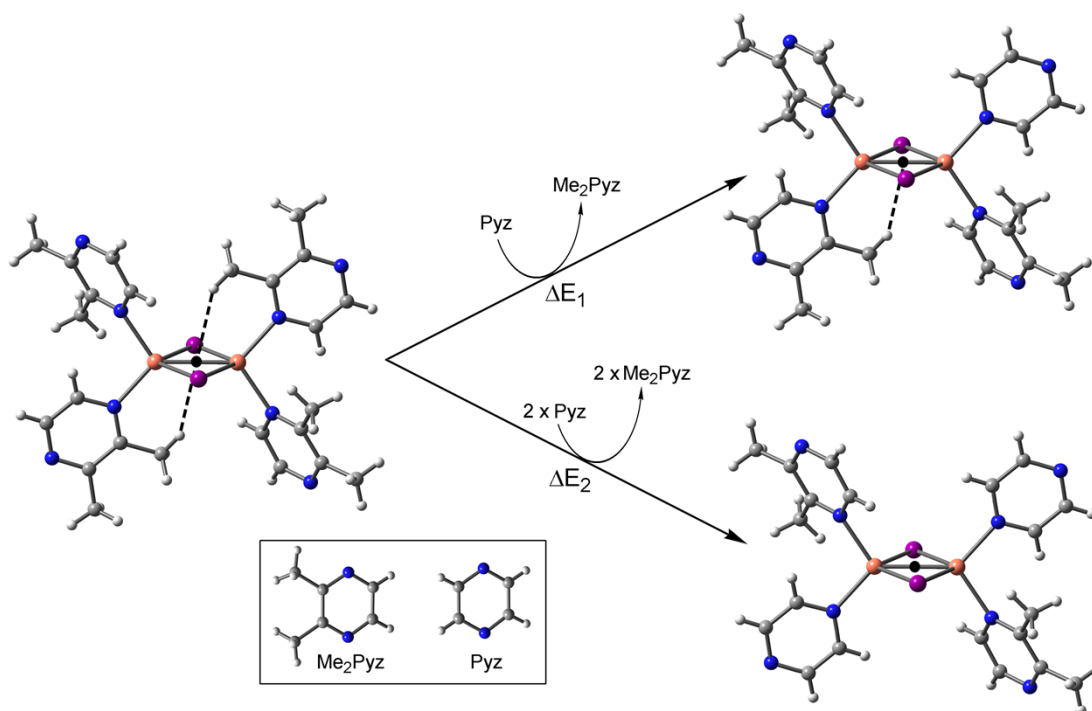

**Figure S2.** Equations used to compute  $\Delta E_1$  and  $\Delta E_2$  energies to estimate the C–H/ $\sigma$  interaction in the X-ray structure reported by Jes et al.<sup>69</sup>

The second work we would like to emphasize was reported by Fang and coworkers<sup>70</sup> in 2010, where a series of controllable assemblies of copper (I) iodine coordination polymers were synthesized, using benzotriazol-1-yl-based pyridyl units as ligands. Their results revealed that

the different spatial positions of pyridyl N-donors play an important role in constructing the coordination polymers. The authors demonstrated that the N-donor spatial positions of the pendant pyridyl groups in such bis-heterocyclic ligand are critical to direct the resulting coordination architectures. In this case, the presence of a C–H/ $\sigma$  interaction certainly influence the final arrangement of the ligand since it is established between a methylene group of the ligand and the Cu<sub>2</sub>I<sub>2</sub> core, as it can be observed in Figure S3. The theoretical model used to compute the CH/ $\sigma$  interaction is also shown in Figure S3, where the ligand has been simplified. That is, we have used two methylpyridine and two methylbenzotriazole ligands coordinated to the Cu<sub>2</sub>I<sub>2</sub> core.

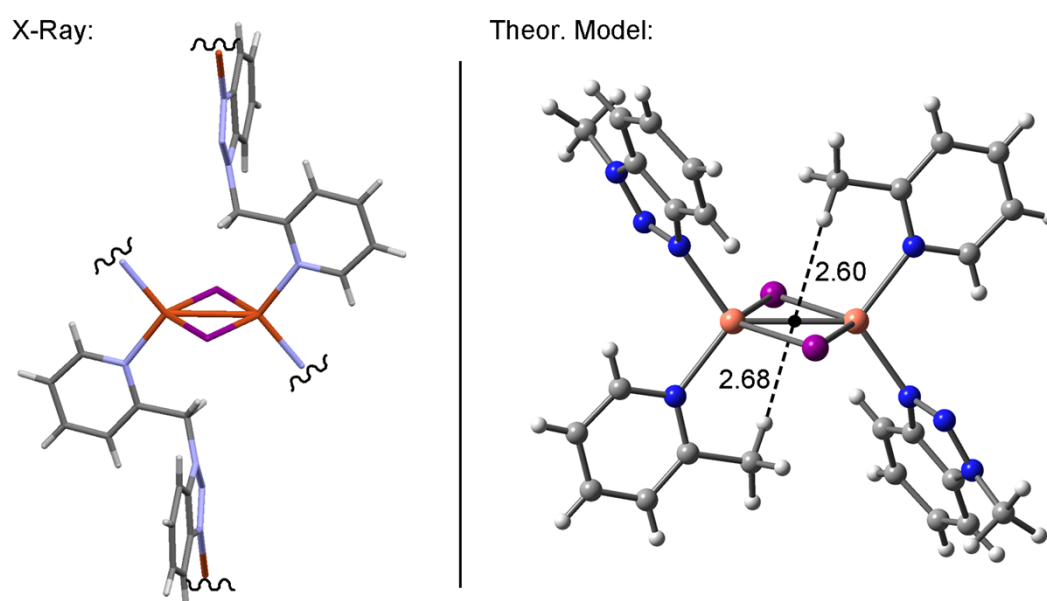

**Figure S3** Left: Partial view of the X-ray structure of the coordination polymer reported by Fang and coworkers<sup>70</sup> (only the monomer is shown). Right: Theoretical model (right) used to study the CH/ $\sigma$  interaction observed in the X-ray structure. Distances (in Å) are measured to the ring centroid.

We have used the same energetic scheme described before to evaluate the C–H/ $\sigma$  interaction (see Figure S4). In this case the complex where one methylpyridine (MePy) ligand is replaced by a pyridine is 5.4 kcal/mol less favorable (denoted as  $\Delta E_3$ ), which is very similar to the energy value computed above for pyrazine. Therefore, for both cases the interaction energy associated to the C–H/ $\sigma$  interaction is around -5 kcal/mol. In this system the interaction energy is also additive, since the computed value for  $\Delta E_4$  is 10.7 kcal/mol, almost twice the value of  $\Delta E_3$ .

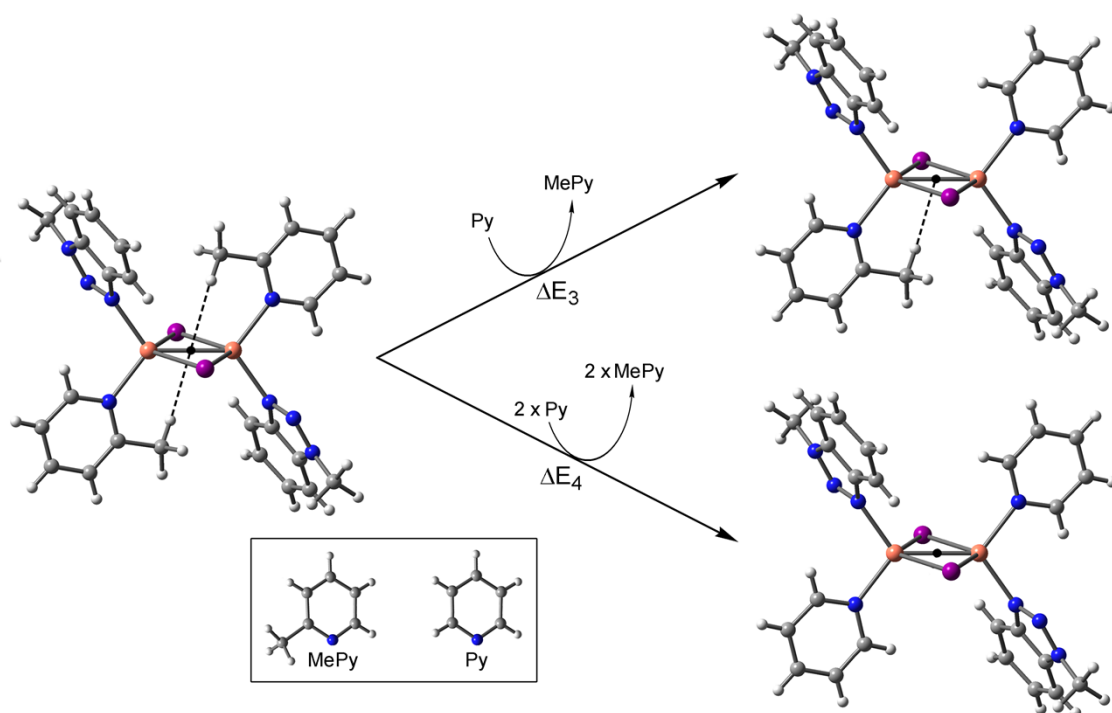

**Figure S4.** Equations used to compute  $\Delta E_3$  and  $\Delta E_4$  energies to estimate the C–H/ $\sigma$  interaction in the X-ray structure reported by Fang et al.<sup>70</sup>

Finally, we have also analyzed the structure reported by Knorr and coworkers,<sup>71</sup> who synthesized a coordination polymer based on a binuclear copper (I) core unit containing Br and I as counterions and dithioethers acting as ligands. The C–H/ $\sigma$  interaction is established between a hydrogen atom of the aromatic ring of the sulfur ligand and the  $\text{Cu}_2\text{I}_2$  core, as it can be observed in Figure S5. The theoretical model used to compute the C–H/ $\sigma$  interaction is also represented where thioanisole is used as a ligand.

For this system the computed values of  $\Delta E_5$  and  $\Delta E_6$  (see Figure S6) are 3.4 and 6.9 kcal/mol, indicating that the interaction is approximately additive. In this case we have replaced thioanisole by dimethylsulfide to evaluate the interaction. For this system the C–H/ $\sigma$  interaction energy less favorable (–3.4 kcal/mol) compared to either MePy (–5.4 kcal/mol) or  $\text{Me}_2\text{Pyz}$  (–5.0 kcal/mol) examples studied above. This is due to the larger distance ( $\sim 0.1$  Å), measured from the interacting hydrogen atom to the  $\text{Cu}_2\text{I}_2$  ring centroid, observed for the thioanisole compared to those observed for the other two structures (methylpyridine and dimethylpyrazine).

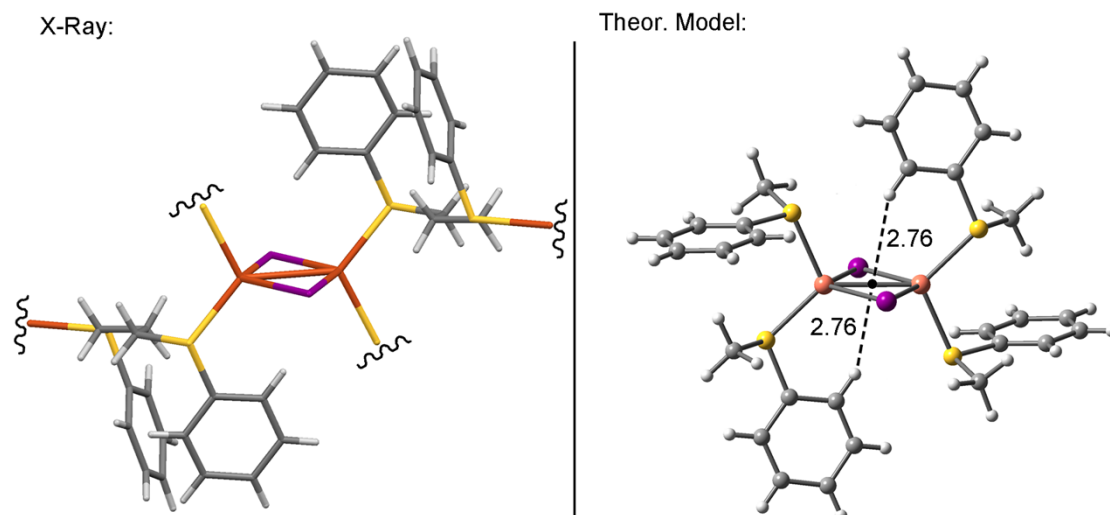

**Figure S5.** Left: Partial view of the X-ray structure of the coordination polymer reported by Knorr and coworkers<sup>71</sup> (only the monomer is shown). Right: Theoretical model (right) used to study the CH/ $\sigma$  interaction observed in the crystal structure. Distances (in Å) are measured to the ring centroid.

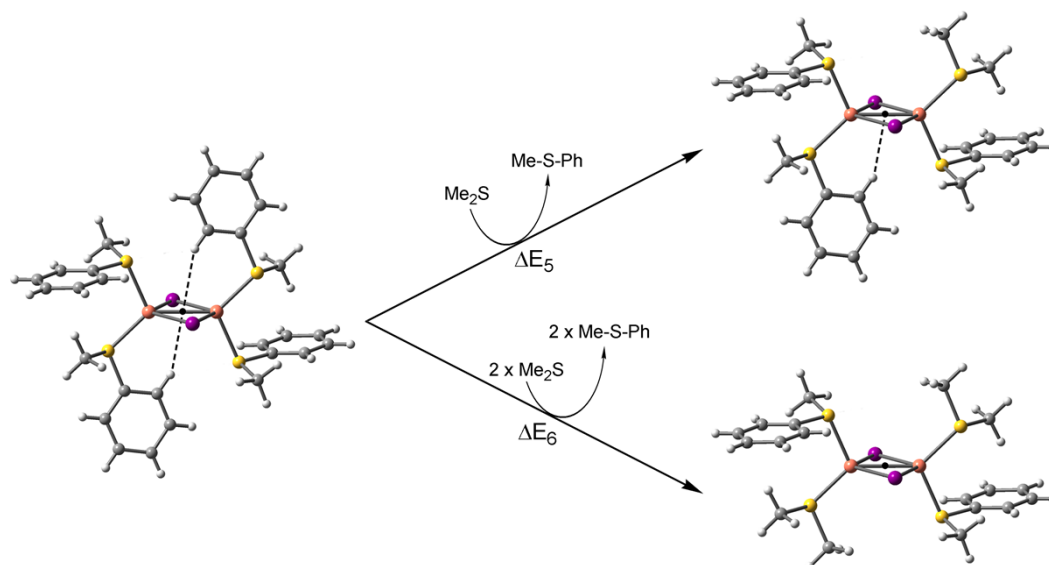

**Figure S6.** Equations used to compute  $\Delta E_3$  and  $\Delta E_4$  energies to estimate the C–H/ $\sigma$  interaction in the X-ray structure reported by Knorr *et al.*<sup>71</sup>

## References

69. I. Jes, P. Taborsky, J. Pospíšil, C. Näther *Dalton Trans.*, **2007**, 22, 2263–2270.
70. S. M. Fang, Q. Zhang, M. Hu, B. Xiao, L. M. Zhou, G. H. Sun, L. J. Gao, M. Du, C. S. Liu *Cryst. Eng. Comm.*, **2010**, 12, 2203–2212.
71. M. Knorr, F. Guyon, A. Khatyr, C. Strohmann, M. Allain, S. M. Aly, A. Lapprand, D. Fortin, P. D. Harvey *Inorg. Chem.* **2012**, 51, 9917–9934.

## TGA study

Thermal stabilities of the three complexes have been studied by thermogravimetric analyses. The TGA curve of **1** shows two-steps degradation (Figure S7). The first degradation within the temperature range 208-253°C correlates to the weight loss of 68.5 % in agreement with the calculated mass loss of 69% corresponding to release of organic ligand. After which it undergoes a second degradation gradually without any sudden change in mass loss up to 600°C. The thermal behaviour of **2** is similar to that of **1**. The TGA curve for **2** (Figure S7) also shows two-steps mass loss within the temperature range 190-262°C. The first degradation within the temperature range 212-242°C correlates to the weight loss of 61.7 % in agreement with the calculated mass loss of 62% corresponding to release of organic ligand. After which it undergoes a second degradation gradually without any sudden change in mass loss up to 600°C. The higher thermal stabilities of the frameworks can be inferred due to the presence of more double bonds in the unsaturated polymer which enhanced the rate of curing and led to the formation of tightly bound frameworks. Finally, The TGA curve for **3** (Figure S7) also shows three-steps mass loss within the temperature range 114-127 and 150-245°C. The first step corresponds to a mass loss of 7 % which agrees well with the calculated value of 7.13% correlated to the release of two acetonitrile molecules, while second steps corresponding to a mass loss of 53.6% agrees well with the calculated value of 54% due to the degradation of the two bridging organic ligands. In all cases, the last step involves the conversion of metal halide to corresponding metal oxide which is confirmed by qualitative test and quantitative analysis.

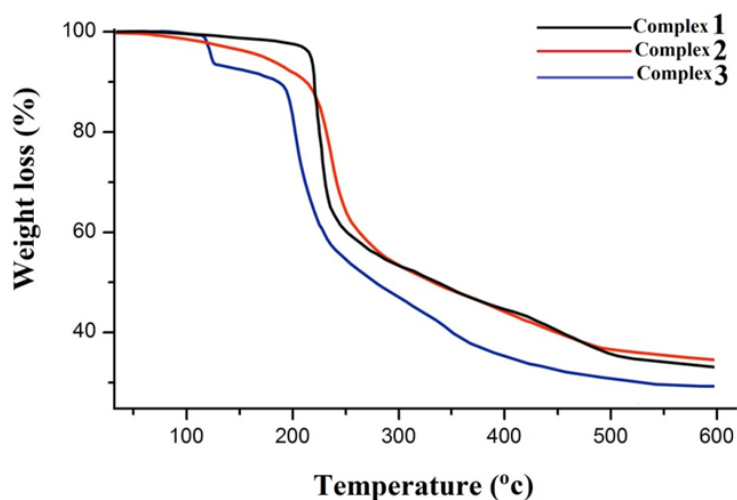

**Figure S7.** TGA curves for compounds **1**, **2** and **3**

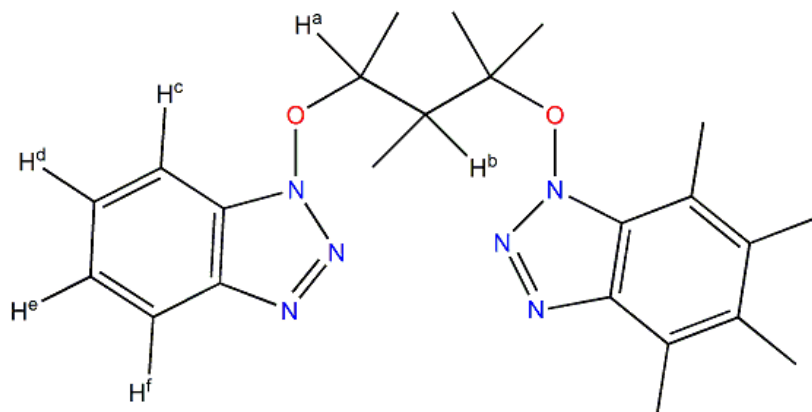

Scheme **SI**: Proton numbering of **L**

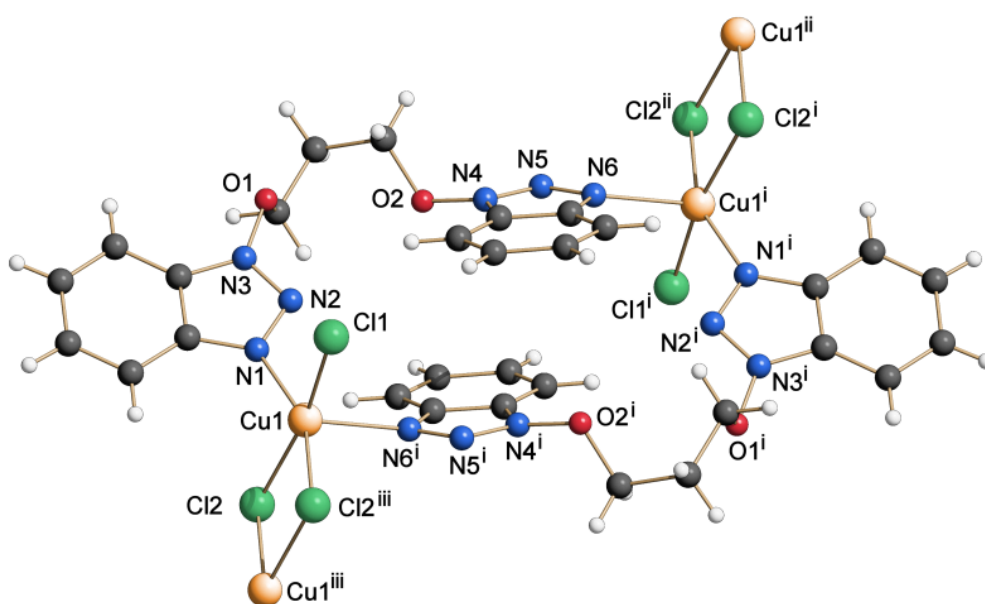

Figure **S8**: The building block of the polymeric chain of complex **1**. Symmetry codes: (i)  $2-x$ ,  $1-y$ ,  $1-z$ ; (ii)  $1+x$ ,  $1+y$ ,  $1+z$ ; (iii)  $1-x$ ,  $-y$ ,  $-z$ .

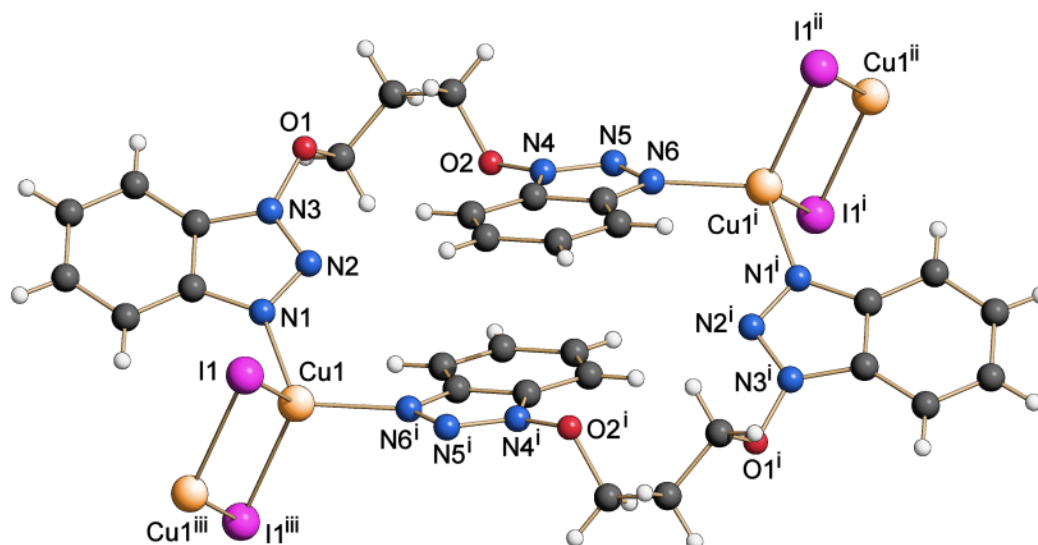

Figure S9: The building block of the polymeric chain of complex **2**. Symmetry codes: (i) 2-x, 1-y, 2-z; (ii) 1+x, 1+y, 1+z; (iii) 1-x, -y, 1-z.

#### Cartesian coordinates of all optimized compounds and complexes:

4.

|    |            |            |            |
|----|------------|------------|------------|
| Cu | 0.0000000  | 1.2083002  | 0.0008641  |
| N  | 0.0000000  | 2.8566794  | 1.4139179  |
| H  | -0.8237466 | 2.7907647  | 2.0188221  |
| C  | 0.0000000  | 4.0888918  | 0.6682195  |
| H  | 0.0000000  | 5.0429549  | 1.2061387  |
| C  | 0.0000000  | 4.0883426  | -0.6690010 |
| H  | 0.0000000  | 5.0420068  | -1.2076482 |
| N  | 0.0000000  | 2.8555474  | -1.4136740 |
| H  | 0.8237644  | 2.7890170  | -2.0184873 |
| H  | -0.8237644 | 2.7890170  | -2.0184873 |
| Cu | 0.0000000  | -1.2083002 | 0.0008641  |
| N  | 0.0000000  | -2.8566794 | 1.4139179  |
| N  | 0.0000000  | -2.8555474 | -1.4136740 |
| H  | 0.8237644  | -2.7890170 | -2.0184873 |



|    |            |            |            |
|----|------------|------------|------------|
| C  | 0.0000000  | -4.0883426 | -0.6690010 |
| H  | 0.0000000  | -5.0420068 | -1.2076482 |
| C  | 0.0000000  | -4.0888918 | 0.6682195  |
| H  | 0.0000000  | -5.0429549 | 1.2061387  |
| H  | -0.8237644 | -2.7890170 | -2.0184873 |
| H  | 0.8237466  | -2.7907647 | 2.0188221  |
| H  | -0.8237466 | -2.7907647 | 2.0188221  |
| H  | 0.8237466  | 2.7907647  | 2.0188221  |
| Cl | 2.0038639  | 0.0000000  | 0.0005133  |
| Cl | -2.0038639 | 0.0000000  | 0.0005133  |

5.

|    |            |            |            |
|----|------------|------------|------------|
| Cu | 0.0000000  | 1.2060497  | 0.2152144  |
| N  | 0.0000000  | 2.9915704  | 1.4254530  |
| H  | -0.8237924 | 2.9945987  | 2.0343375  |
| C  | 0.0000000  | 4.1347125  | 0.5478304  |
| H  | 0.0000000  | 5.1414138  | 0.9788113  |
| C  | 0.0000000  | 3.9874977  | -0.7811410 |
| H  | 0.0000000  | 4.8761693  | -1.4209922 |
| N  | 0.0000000  | 2.6808369  | -1.3856284 |
| H  | 0.8249395  | 2.5441417  | -1.9766933 |
| H  | -0.8249395 | 2.5441417  | -1.9766933 |
| Cu | 0.0000000  | -1.2060497 | 0.2152144  |
| N  | 0.0000000  | -2.9915704 | 1.4254530  |
| N  | 0.0000000  | -2.6808369 | -1.3856284 |
| H  | 0.8249395  | -2.5441417 | -1.9766933 |
| C  | 0.0000000  | -3.9874977 | -0.7811410 |
| H  | 0.0000000  | -4.8761693 | -1.4209922 |
| C  | 0.0000000  | -4.1347125 | 0.5478304  |

|    |            |            |            |
|----|------------|------------|------------|
| H  | 0.0000000  | -5.1414138 | 0.9788113  |
| H  | -0.8249395 | -2.5441417 | -1.9766933 |
| H  | 0.8237924  | -2.9945987 | 2.0343375  |
| H  | -0.8237924 | -2.9945987 | 2.0343375  |
| H  | 0.8237924  | 2.9945987  | 2.0343375  |
| Br | 2.1511883  | 0.0000000  | 0.3051642  |
| Br | -2.1511883 | 0.0000000  | 0.3051642  |

6.

|    |            |            |            |
|----|------------|------------|------------|
| Cu | 0.0000000  | 1.2080201  | -0.0008658 |
| N  | 0.0000000  | 2.8508879  | 1.4137360  |
| H  | -0.8250942 | 2.7815458  | 2.0167379  |
| C  | 0.0000000  | 4.0836119  | 0.6688734  |
| H  | 0.0000000  | 5.0363818  | 1.2084008  |
| C  | 0.0000000  | 4.0841947  | -0.6679439 |
| H  | 0.0000000  | 5.0373997  | -1.2066901 |
| N  | 0.0000000  | 2.8520968  | -1.4138609 |
| H  | 0.8250717  | 2.7833237  | -2.0169582 |
| H  | -0.8250717 | 2.7833237  | -2.0169582 |
| Cu | 0.0000000  | -1.2080201 | -0.0008658 |
| N  | 0.0000000  | -2.8508879 | 1.4137360  |
| N  | 0.0000000  | -2.8520968 | -1.4138609 |
| H  | 0.8250717  | -2.7833237 | -2.0169582 |
| C  | 0.0000000  | -4.0841947 | -0.6679439 |
| H  | 0.0000000  | -5.0373997 | -1.2066901 |
| C  | 0.0000000  | -4.0836119 | 0.6688734  |
| H  | 0.0000000  | -5.0363818 | 1.2084008  |
| H  | -0.8250717 | -2.7833237 | -2.0169582 |
| H  | 0.8250942  | -2.7815458 | 2.0167379  |

|   |            |            |            |
|---|------------|------------|------------|
| H | -0.8250942 | -2.7815458 | 2.0167379  |
| H | 0.8250942  | 2.7815458  | 2.0167379  |
| I | -2.3235448 | 0.0000000  | -0.0012089 |
| I | 2.3235448  | 0.0000000  | -0.0012089 |

7.

|    |            |            |            |
|----|------------|------------|------------|
| Cu | 0.0000000  | 1.3998231  | 0.0814551  |
| N  | 0.0000000  | 3.1198090  | 1.4132573  |
| H  | -0.8251994 | 3.0626610  | 2.0172326  |
| C  | 0.0000000  | 4.3251728  | 0.6242596  |
| H  | 0.0000000  | 5.2976728  | 1.1271848  |
| C  | 0.0000000  | 4.2668508  | -0.7108157 |
| H  | 0.0000000  | 5.1920798  | -1.2960516 |
| N  | 0.0000000  | 2.9981152  | -1.3912887 |
| H  | 0.8259659  | 2.8846936  | -1.9861009 |
| H  | -0.8259659 | 2.8846936  | -1.9861009 |
| Cu | 0.0000000  | -1.3998231 | 0.0814551  |
| N  | 0.0000000  | -3.1198090 | 1.4132573  |
| N  | 0.0000000  | -2.9981152 | -1.3912887 |
| H  | 0.8259659  | -2.8846936 | -1.9861009 |
| C  | 0.0000000  | -4.2668508 | -0.7108157 |
| H  | 0.0000000  | -5.1920798 | -1.2960516 |
| C  | 0.0000000  | -4.3251728 | 0.6242596  |
| H  | 0.0000000  | -5.2976728 | 1.1271848  |
| H  | -0.8259659 | -2.8846936 | -1.9861009 |
| H  | 0.8251994  | -3.0626610 | 2.0172326  |
| H  | -0.8251994 | -3.0626610 | 2.0172326  |
| H  | 0.8251994  | 3.0626610  | 2.0172326  |
| S  | 1.7487197  | 0.0000000  | 0.0897357  |

|   |            |           |           |
|---|------------|-----------|-----------|
| S | -1.7487197 | 0.0000000 | 0.0897357 |
|---|------------|-----------|-----------|

8.

|    |            |            |            |
|----|------------|------------|------------|
| Cu | 0.0000000  | 1.4316335  | 0.0106753  |
| C  | 0.0000000  | 4.1682144  | 0.7354543  |
| H  | 0.0000000  | 5.1169033  | 1.3014841  |
| C  | 0.0000000  | 4.1648275  | -0.7416023 |
| H  | 0.0000000  | 5.1115502  | -1.3111860 |
| Cu | 0.0000000  | -1.4316335 | 0.0106753  |
| C  | 0.0000000  | -4.1648275 | -0.7416023 |
| H  | 0.0000000  | -5.1115502 | -1.3111860 |
| C  | 0.0000000  | -4.1682144 | 0.7354543  |
| H  | 0.0000000  | -5.1169033 | 1.3014841  |
| O  | 0.0000000  | 3.0623640  | -1.3186729 |
| O  | 0.0000000  | 3.0679090  | 1.3175380  |
| O  | 0.0000000  | -3.0623640 | -1.3186729 |
| O  | 0.0000000  | -3.0679090 | 1.3175380  |
| Cl | -1.7486723 | 0.0000000  | 0.0063095  |
| Cl | 1.7486723  | 0.0000000  | 0.0063095  |

9.

|    |           |            |            |
|----|-----------|------------|------------|
| Cu | 0.0000000 | 1.4583346  | 0.0416453  |
| C  | 0.0000000 | 4.2034431  | 0.7230275  |
| H  | 0.0000000 | 5.1593590  | 1.2767319  |
| C  | 0.0000000 | 4.1835596  | -0.7544240 |
| H  | 0.0000000 | 5.1262704  | -1.3310751 |
| Cu | 0.0000000 | -1.4583346 | 0.0416453  |
| C  | 0.0000000 | -4.1835596 | -0.7544240 |
| H  | 0.0000000 | -5.1262704 | -1.3310751 |

|    |            |            |            |
|----|------------|------------|------------|
| C  | 0.0000000  | -4.2034431 | 0.7230275  |
| H  | 0.0000000  | -5.1593590 | 1.2767319  |
| O  | 0.0000000  | 3.0767750  | -1.3215973 |
| O  | 0.0000000  | 3.1112199  | 1.3197803  |
| O  | 0.0000000  | -3.0767750 | -1.3215973 |
| O  | 0.0000000  | -3.1112199 | 1.3197803  |
| Br | -1.8943071 | 0.0000000  | 0.0459113  |
| Br | 1.8943071  | 0.0000000  | 0.0459113  |

10.

|    |            |            |            |
|----|------------|------------|------------|
| Cu | 0.0000000  | 1.6779855  | 0.0316632  |
| C  | 0.0000000  | 4.2620537  | 0.6866726  |
| H  | 0.0000000  | 5.1925554  | 1.2689379  |
| C  | 0.0000000  | 4.2358919  | -0.7164613 |
| H  | 0.0000000  | 5.1435016  | -1.3336730 |
| Cu | 0.0000000  | -1.6779855 | 0.0316632  |
| C  | 0.0000000  | -4.2358919 | -0.7164613 |
| H  | 0.0000000  | -5.1435016 | -1.3336730 |
| C  | 0.0000000  | -4.2620537 | 0.6866726  |
| H  | 0.0000000  | -5.1925554 | 1.2689379  |
| O  | 0.0000000  | 3.0826821  | -1.3187855 |
| O  | 0.0000000  | 3.1323245  | 1.3313963  |
| O  | 0.0000000  | -3.0826821 | -1.3187855 |
| O  | 0.0000000  | -3.1323245 | 1.3313963  |
| I  | -1.9942393 | 0.0000000  | 0.0502498  |
| I  | 1.9942393  | 0.0000000  | 0.0502498  |

11.

|    |           |           |           |
|----|-----------|-----------|-----------|
| Cu | 0.0000000 | 1.2824093 | 0.0300044 |
|----|-----------|-----------|-----------|

|    |            |            |            |
|----|------------|------------|------------|
| C  | 0.0000000  | 3.8912630  | 0.6998145  |
| H  | 0.0000000  | 4.8327625  | 1.2675390  |
| C  | 0.0000000  | 3.8668017  | -0.7272055 |
| H  | 0.0000000  | 4.7881909  | -1.3268799 |
| Cu | 0.0000000  | -1.2824093 | 0.0300044  |
| C  | 0.0000000  | -3.8668017 | -0.7272055 |
| H  | 0.0000000  | -4.7881909 | -1.3268799 |
| C  | 0.0000000  | -3.8912630 | 0.6998145  |
| H  | 0.0000000  | -4.8327625 | 1.2675390  |
| S  | 1.8240509  | 0.0000000  | 0.0461255  |
| S  | -1.8240509 | 0.0000000  | 0.0461255  |
| O  | 0.0000000  | 2.7351024  | -1.3220661 |
| O  | 0.0000000  | 2.7804134  | 1.3326682  |
| O  | 0.0000000  | -2.7351024 | -1.3220661 |
| O  | 0.0000000  | -2.7804134 | 1.3326682  |

12.

|   |           |            |            |
|---|-----------|------------|------------|
| C | 0.0000000 | 4.7564172  | 0.7053740  |
| H | 0.0000000 | 5.7216367  | 1.2323179  |
| C | 0.0000000 | 4.7444553  | -0.7233975 |
| H | 0.0000000 | 5.7006396  | -1.2665462 |
| C | 0.0000000 | -4.7444553 | -0.7233975 |
| H | 0.0000000 | -5.7006396 | -1.2665462 |
| C | 0.0000000 | -4.7564172 | 0.7053740  |
| H | 0.0000000 | -5.7216367 | 1.2323179  |
| O | 0.0000000 | 3.6615519  | -1.4066107 |
| O | 0.0000000 | 3.6853539  | 1.4068716  |
| O | 0.0000000 | -3.6615519 | -1.4066107 |
| O | 0.0000000 | -3.6853539 | 1.4068716  |

|    |            |            |           |
|----|------------|------------|-----------|
| Cl | -1.7852976 | 0.0000000  | 0.0356614 |
| Cl | 1.7852976  | 0.0000000  | 0.0356614 |
| Hg | 0.0000000  | -1.8446380 | 0.0163295 |
| Hg | 0.0000000  | 1.8446380  | 0.0163295 |

13.

|    |            |            |            |
|----|------------|------------|------------|
| C  | 0.0000000  | 4.7741056  | 0.7182909  |
| H  | 0.0000000  | 5.7345316  | 1.2547336  |
| C  | 0.0000000  | 4.7799053  | -0.7107945 |
| H  | 0.0000000  | 5.7443581  | -1.2398461 |
| C  | 0.0000000  | -4.7799053 | -0.7107945 |
| H  | 0.0000000  | -5.7443581 | -1.2398461 |
| C  | 0.0000000  | -4.7741056 | 0.7182909  |
| H  | 0.0000000  | -5.7345316 | 1.2547336  |
| O  | 0.0000000  | 3.7071745  | -1.4098990 |
| O  | 0.0000000  | 3.6959364  | 1.4084078  |
| O  | 0.0000000  | -3.7071745 | -1.4098990 |
| O  | 0.0000000  | -3.6959364 | 1.4084078  |
| Br | -1.9409201 | 0.0000000  | -0.0104321 |
| Br | 1.9409201  | 0.0000000  | -0.0104321 |
| Hg | 0.0000000  | -1.8646071 | -0.0104605 |
| Hg | 0.0000000  | 1.8646071  | -0.0104605 |

14.

|   |           |            |            |
|---|-----------|------------|------------|
| C | 0.0000000 | 4.8343753  | 0.6934165  |
| H | 0.0000000 | 5.8105458  | 1.2016665  |
| C | 0.0000000 | 4.8024858  | -0.7354439 |
| H | 0.0000000 | 5.7552780  | -1.2862807 |
| C | 0.0000000 | -4.8024858 | -0.7354439 |

|    |            |            |            |
|----|------------|------------|------------|
| H  | 0.0000000  | -5.7552780 | -1.2862807 |
| C  | 0.0000000  | -4.8343753 | 0.6934165  |
| H  | 0.0000000  | -5.8105458 | 1.2016665  |
| O  | 0.0000000  | 3.7135598  | -1.4082551 |
| O  | 0.0000000  | 3.7764140  | 1.4143850  |
| O  | 0.0000000  | -3.7135598 | -1.4082551 |
| O  | 0.0000000  | -3.7764140 | 1.4143850  |
| I  | -2.1248124 | 0.0000000  | 0.0735749  |
| I  | 2.1248124  | 0.0000000  | 0.0735749  |
| Hg | 0.0000000  | -1.8953184 | 0.0469368  |
| Hg | 0.0000000  | 1.8953184  | 0.0469368  |

15.

|    |            |            |            |
|----|------------|------------|------------|
| Cu | 0.0000000  | 1.2824093  | 0.0300044  |
| C  | 0.0000000  | 3.8912630  | 0.6998145  |
| H  | 0.0000000  | 4.8327625  | 1.2675390  |
| C  | 0.0000000  | 3.8668017  | -0.7272055 |
| H  | 0.0000000  | 4.7881909  | -1.3268799 |
| Cu | 0.0000000  | -1.2824093 | 0.0300044  |
| C  | 0.0000000  | -3.8668017 | -0.7272055 |
| H  | 0.0000000  | -4.7881909 | -1.3268799 |
| C  | 0.0000000  | -3.8912630 | 0.6998145  |
| H  | 0.0000000  | -4.8327625 | 1.2675390  |
| S  | 1.8240509  | 0.0000000  | 0.0461255  |
| S  | -1.8240509 | 0.0000000  | 0.0461255  |
| O  | 0.0000000  | 2.7351024  | -1.3220661 |
| O  | 0.0000000  | 2.7804134  | 1.3326682  |
| O  | 0.0000000  | -2.7351024 | -1.3220661 |
| O  | 0.0000000  | -2.7804134 | 1.3326682  |



16.

|    |            |            |            |
|----|------------|------------|------------|
| Cu | 0.0000000  | 1.2198923  | 0.7601805  |
| N  | 0.0000000  | 2.9920123  | 1.9733796  |
| H  | -0.8222652 | 2.9990056  | 2.5844753  |
| C  | 0.0000000  | 4.1408845  | 1.1000584  |
| H  | 0.0000000  | 5.1439962  | 1.5390102  |
| C  | 0.0000000  | 4.0012577  | -0.2297369 |
| H  | 0.0000000  | 4.8950035  | -0.8627420 |
| N  | 0.0000000  | 2.7003265  | -0.8432654 |
| H  | 0.8203128  | 2.5679905  | -1.4428663 |
| H  | -0.8203128 | 2.5679905  | -1.4428663 |
| Cu | 0.0000000  | -1.2198923 | 0.7601805  |
| N  | 0.0000000  | -2.9920123 | 1.9733796  |
| N  | 0.0000000  | -2.7003265 | -0.8432654 |
| H  | 0.8203128  | -2.5679905 | -1.4428663 |
| C  | 0.0000000  | -4.0012577 | -0.2297369 |
| H  | 0.0000000  | -4.8950035 | -0.8627420 |
| C  | 0.0000000  | -4.1408845 | 1.1000584  |
| H  | 0.0000000  | -5.1439962 | 1.5390102  |
| H  | -0.8203128 | -2.5679905 | -1.4428663 |
| H  | 0.8222652  | -2.9990056 | 2.5844753  |
| H  | -0.8222652 | -2.9990056 | 2.5844753  |
| H  | 0.8222652  | 2.9990056  | 2.5844753  |
| C  | 0.0000000  | 0.0000000  | -3.8441691 |
| H  | 0.0000000  | 0.0000000  | -4.9150221 |
| C  | 0.0000000  | 0.0000000  | -2.6340133 |
| H  | 0.0000000  | 0.0000000  | -1.5506662 |
| Cl | 1.9915020  | 0.0000000  | 0.7518330  |
| Cl | -1.9915020 | 0.0000000  | 0.7518330  |

17.

|    |            |            |            |
|----|------------|------------|------------|
| Cu | 0.0000000  | 1.2151159  | 0.7561487  |
| N  | 0.0000000  | 2.9842431  | 1.9744540  |
| H  | -0.8231996 | 2.9882841  | 2.5843016  |
| C  | 0.0000000  | 4.1325912  | 1.1010195  |
| H  | 0.0000000  | 5.1358857  | 1.5393494  |
| C  | 0.0000000  | 3.9924795  | -0.2285557 |
| H  | 0.0000000  | 4.8852136  | -0.8626656 |
| N  | 0.0000000  | 2.6911613  | -0.8425000 |
| H  | 0.8207356  | 2.5597383  | -1.4419624 |
| H  | -0.8207356 | 2.5597383  | -1.4419624 |
| Cu | 0.0000000  | -1.2151159 | 0.7561487  |
| N  | 0.0000000  | -2.9842431 | 1.9744540  |
| N  | 0.0000000  | -2.6911613 | -0.8425000 |
| H  | 0.8207356  | -2.5597383 | -1.4419624 |
| C  | 0.0000000  | -3.9924795 | -0.2285557 |
| H  | 0.0000000  | -4.8852136 | -0.8626656 |
| C  | 0.0000000  | -4.1325912 | 1.1010195  |
| H  | 0.0000000  | -5.1358857 | 1.5393494  |
| H  | -0.8207356 | -2.5597383 | -1.4419624 |
| H  | 0.8231996  | -2.9882841 | 2.5843016  |
| H  | -0.8231996 | -2.9882841 | 2.5843016  |
| H  | 0.8231996  | 2.9882841  | 2.5843016  |
| C  | 0.0000000  | 0.0000000  | -3.8591712 |
| H  | 0.0000000  | 0.0000000  | -4.9300558 |
| C  | 0.0000000  | 0.0000000  | -2.6490495 |
| H  | 0.0000000  | 0.0000000  | -1.5657093 |
| Br | 2.1426299  | 0.0000000  | 0.7800641  |
| Br | -2.1426299 | 0.0000000  | 0.7800641  |

18.

|    |            |            |            |
|----|------------|------------|------------|
| Cu | 0.0000000  | 1.2120626  | 0.7478189  |
| N  | 0.0000000  | 2.9726368  | 1.9781885  |
| H  | -0.8240305 | 2.9696320  | 2.5871330  |
| C  | 0.0000000  | 4.1267749  | 1.1129566  |
| H  | 0.0000000  | 5.1267247  | 1.5585302  |
| C  | 0.0000000  | 3.9957052  | -0.2173562 |
| H  | 0.0000000  | 4.8922139  | -0.8457741 |
| N  | 0.0000000  | 2.6985488  | -0.8406316 |
| H  | 0.8214942  | 2.5705346  | -1.4399490 |
| H  | -0.8214942 | 2.5705346  | -1.4399490 |
| Cu | 0.0000000  | -1.2120626 | 0.7478189  |
| N  | 0.0000000  | -2.9726368 | 1.9781885  |
| N  | 0.0000000  | -2.6985488 | -0.8406316 |
| H  | 0.8214942  | -2.5705346 | -1.4399490 |
| C  | 0.0000000  | -3.9957052 | -0.2173562 |
| H  | 0.0000000  | -4.8922139 | -0.8457741 |
| C  | 0.0000000  | -4.1267749 | 1.1129566  |
| H  | 0.0000000  | -5.1267247 | 1.5585302  |
| H  | -0.8214942 | -2.5705346 | -1.4399490 |
| H  | 0.8240305  | -2.9696320 | 2.5871330  |
| H  | -0.8240305 | -2.9696320 | 2.5871330  |
| H  | 0.8240305  | 2.9696320  | 2.5871330  |
| I  | 2.3187249  | 0.0000000  | 0.7864987  |
| I  | -2.3187249 | 0.0000000  | 0.7864987  |
| C  | 0.0000000  | 0.0000000  | -3.8952719 |
| H  | 0.0000000  | 0.0000000  | -4.9661505 |
| C  | 0.0000000  | 0.0000000  | -2.6851895 |
| H  | 0.0000000  | 0.0000000  | -1.6025862 |

19.

|    |            |            |            |
|----|------------|------------|------------|
| Cu | 0.0000000  | 1.4221052  | 0.8324072  |
| N  | 0.0000000  | 3.2880762  | 1.9395333  |
| H  | -0.8241552 | 3.3141738  | 2.5471947  |
| C  | 0.0000000  | 4.3820406  | 1.0001345  |
| H  | 0.0000000  | 5.4107046  | 1.3743053  |
| C  | 0.0000000  | 4.1515401  | -0.3161485 |
| H  | 0.0000000  | 4.9931031  | -1.0162134 |
| N  | 0.0000000  | 2.8068460  | -0.8290391 |
| H  | 0.8213205  | 2.6185484  | -1.4124553 |
| H  | -0.8213205 | 2.6185484  | -1.4124553 |
| Cu | 0.0000000  | -1.4221052 | 0.8324072  |
| N  | 0.0000000  | -3.2880762 | 1.9395333  |
| N  | 0.0000000  | -2.8068460 | -0.8290391 |
| H  | 0.8213205  | -2.6185484 | -1.4124553 |
| C  | 0.0000000  | -4.1515401 | -0.3161485 |
| H  | 0.0000000  | -4.9931031 | -1.0162134 |
| C  | 0.0000000  | -4.3820406 | 1.0001345  |
| H  | 0.0000000  | -5.4107046 | 1.3743053  |
| H  | -0.8213205 | -2.6185484 | -1.4124553 |
| H  | 0.8241552  | -3.3141738 | 2.5471947  |
| H  | -0.8241552 | -3.3141738 | 2.5471947  |
| H  | 0.8241552  | 3.3141738  | 2.5471947  |
| C  | 0.0000000  | 0.0000000  | -3.7114661 |
| H  | 0.0000000  | 0.0000000  | -4.7822427 |
| C  | 0.0000000  | 0.0000000  | -2.5006015 |
| H  | 0.0000000  | 0.0000000  | -1.4169268 |
| S  | 1.7265316  | 0.0000000  | 0.9511602  |
| S  | -1.7265316 | 0.0000000  | 0.9511602  |

20.

|    |            |            |            |
|----|------------|------------|------------|
| Cu | 0.0000000  | 1.4370932  | 1.2071503  |
| C  | 0.0000000  | 4.2304440  | 1.3218098  |
| H  | 0.0000000  | 5.2493907  | 1.7454679  |
| C  | 0.0000000  | 4.0072621  | -0.1419322 |
| H  | 0.0000000  | 4.8725612  | -0.8326391 |
| Cu | 0.0000000  | -1.4370932 | 1.2071503  |
| C  | 0.0000000  | -4.0072621 | -0.1419322 |
| H  | 0.0000000  | -4.8725612 | -0.8326391 |
| C  | 0.0000000  | -4.2304440 | 1.3218098  |
| H  | 0.0000000  | -5.2493907 | 1.7454679  |
| C  | 0.0000000  | 0.0000000  | -3.5810235 |
| H  | 0.0000000  | 0.0000000  | -4.6512538 |
| C  | 0.0000000  | 0.0000000  | -2.3728198 |
| H  | 0.0000000  | 0.0000000  | -1.3001560 |
| O  | 0.0000000  | 2.8424470  | -0.5571454 |
| O  | 0.0000000  | 3.2303591  | 2.0692945  |
| O  | 0.0000000  | -3.2303591 | 2.0692945  |
| O  | 0.0000000  | -2.8424470 | -0.5571454 |
| Cl | -1.7427132 | 0.0000000  | 1.1406207  |
| Cl | 1.7427132  | 0.0000000  | 1.1406207  |

21.

|    |           |            |            |
|----|-----------|------------|------------|
| Cu | 0.0000000 | 1.4571472  | 1.1174105  |
| C  | 0.0000000 | 4.2496816  | 1.3801116  |
| H  | 0.0000000 | 5.2571047  | 1.8318129  |
| C  | 0.0000000 | 4.0704541  | -0.0894584 |
| H  | 0.0000000 | 4.9526959  | -0.7573113 |
| Cu | 0.0000000 | -1.4571472 | 1.1174105  |

|    |            |            |            |
|----|------------|------------|------------|
| C  | 0.0000000  | -4.0704541 | -0.0894584 |
| H  | 0.0000000  | -4.9526959 | -0.7573113 |
| C  | 0.0000000  | -4.2496816 | 1.3801116  |
| H  | 0.0000000  | -5.2571047 | 1.8318129  |
| C  | 0.0000000  | 0.0000000  | -3.6629652 |
| H  | 0.0000000  | 0.0000000  | -4.7332694 |
| C  | 0.0000000  | 0.0000000  | -2.4547002 |
| H  | 0.0000000  | 0.0000000  | -1.3819073 |
| Br | 1.8934199  | 0.0000000  | 1.0759581  |
| Br | -1.8934199 | 0.0000000  | 1.0759581  |
| O  | 0.0000000  | 2.9157843  | -0.5374117 |
| O  | 0.0000000  | 3.2282860  | 2.0953094  |
| O  | 0.0000000  | -3.2282860 | 2.0953094  |
| O  | 0.0000000  | -2.9157843 | -0.5374117 |

22.

|    |           |            |            |
|----|-----------|------------|------------|
| Cu | 0.0000000 | 1.6713398  | 0.9777708  |
| C  | 0.0000000 | 4.3040540  | 1.3971376  |
| H  | 0.0000000 | 5.2850221  | 1.8897932  |
| C  | 0.0000000 | 4.1476337  | 0.0025034  |
| H  | 0.0000000 | 4.9913176  | -0.6992268 |
| Cu | 0.0000000 | -1.6713398 | 0.9777708  |
| C  | 0.0000000 | -4.1476337 | 0.0025034  |
| H  | 0.0000000 | -4.9913176 | -0.6992268 |
| C  | 0.0000000 | -4.3040540 | 1.3971376  |
| H  | 0.0000000 | -5.2850221 | 1.8897932  |
| C  | 0.0000000 | 0.0000000  | -3.7500185 |
| H  | 0.0000000 | 0.0000000  | -4.8204622 |
| C  | 0.0000000 | 0.0000000  | -2.5422331 |

|   |            |            |            |
|---|------------|------------|------------|
| H | 0.0000000  | 0.0000000  | -1.4706322 |
| O | 0.0000000  | 2.9428752  | -0.4894478 |
| O | 0.0000000  | 3.2386497  | 2.1425839  |
| O | 0.0000000  | -3.2386497 | 2.1425839  |
| O | 0.0000000  | -2.9428752 | -0.4894478 |
| I | -1.9955661 | 0.0000000  | 1.0705589  |
| I | 1.9955661  | 0.0000000  | 1.0705589  |

23.

|    |            |            |            |
|----|------------|------------|------------|
| Cu | 0.0000000  | 1.6731421  | 0.8760943  |
| C  | 0.0000000  | 4.2911638  | 1.4810224  |
| H  | 0.0000000  | 5.2401094  | 2.0350808  |
| C  | 0.0000000  | 4.2318814  | 0.0654141  |
| H  | 0.0000000  | 5.1296602  | -0.5678264 |
| Cu | 0.0000000  | -1.6731421 | 0.8760943  |
| C  | 0.0000000  | -4.2318814 | 0.0654141  |
| H  | 0.0000000  | -5.1296602 | -0.5678264 |
| C  | 0.0000000  | -4.2911638 | 1.4810224  |
| H  | 0.0000000  | -5.2401094 | 2.0350808  |
| C  | 0.0000000  | 0.0000000  | -3.8320763 |
| H  | 0.0000000  | 0.0000000  | -4.9024866 |
| C  | 0.0000000  | 0.0000000  | -2.6240501 |
| H  | 0.0000000  | 0.0000000  | -1.5512190 |
| O  | 0.0000000  | 3.0744618  | -0.5010405 |
| O  | 0.0000000  | 3.1853284  | 2.1423459  |
| O  | 0.0000000  | -3.1853284 | 2.1423459  |
| O  | 0.0000000  | -3.0744618 | -0.5010405 |
| S  | -1.4200939 | 0.0000000  | 0.9238253  |
| S  | 1.4200939  | 0.0000000  | 0.9238253  |

24.

|    |            |            |            |
|----|------------|------------|------------|
| C  | 0.0000000  | 4.8309626  | 1.2576189  |
| H  | 0.0000000  | 5.8709529  | 1.6132496  |
| C  | 0.0000000  | 4.5744756  | -0.1477663 |
| H  | 0.0000000  | 5.4239562  | -0.8463423 |
| C  | 0.0000000  | -4.5744756 | -0.1477663 |
| H  | 0.0000000  | -5.4239562 | -0.8463423 |
| C  | 0.0000000  | -4.8309626 | 1.2576189  |
| H  | 0.0000000  | -5.8709529 | 1.6132496  |
| C  | 0.0000000  | 0.0000000  | -3.4859476 |
| H  | 0.0000000  | 0.0000000  | -4.5565808 |
| C  | 0.0000000  | 0.0000000  | -2.2785659 |
| H  | 0.0000000  | 0.0000000  | -1.2088882 |
| O  | 0.0000000  | 3.3914951  | -0.6334534 |
| O  | 0.0000000  | 3.8958499  | 2.1351726  |
| O  | 0.0000000  | -3.8958499 | 2.1351726  |
| O  | 0.0000000  | -3.3914951 | -0.6334534 |
| Cl | -1.7673289 | 0.0000000  | 1.2912918  |
| Cl | 1.7673289  | 0.0000000  | 1.2912918  |
| Hg | 0.0000000  | 1.8534519  | 1.0952203  |
| Hg | 0.0000000  | -1.8534519 | 1.0952203  |

25.

|   |           |            |            |
|---|-----------|------------|------------|
| C | 0.0000000 | 4.8662244  | 1.2217864  |
| H | 0.0000000 | 5.9150332  | 1.5514861  |
| C | 0.0000000 | 4.5780774  | -0.1776664 |
| H | 0.0000000 | 5.4134247  | -0.8935951 |
| C | 0.0000000 | -4.5780774 | -0.1776664 |
| H | 0.0000000 | -5.4134247 | -0.8935951 |



|    |            |            |            |
|----|------------|------------|------------|
| C  | 0.0000000  | -4.8662244 | 1.2217864  |
| H  | 0.0000000  | -5.9150332 | 1.5514861  |
| C  | 0.0000000  | 0.0000000  | -3.4491493 |
| H  | 0.0000000  | 0.0000000  | -4.5197842 |
| C  | 0.0000000  | 0.0000000  | -2.2417489 |
| H  | 0.0000000  | 0.0000000  | -1.1721799 |
| Br | 1.9066791  | 0.0000000  | 1.3780288  |
| Br | -1.9066791 | 0.0000000  | 1.3780288  |
| O  | 0.0000000  | 3.3853585  | -0.6385346 |
| O  | 0.0000000  | 3.9529444  | 2.1218403  |
| O  | 0.0000000  | -3.9529444 | 2.1218403  |
| O  | 0.0000000  | -3.3853585 | -0.6385346 |
| Hg | 0.0000000  | 1.8797229  | 1.1280857  |
| Hg | 0.0000000  | -1.8797229 | 1.1280857  |

26.

|   |           |            |            |
|---|-----------|------------|------------|
| C | 0.0000000 | 4.7792457  | 1.5994386  |
| H | 0.0000000 | 5.7174549  | 2.1747440  |
| C | 0.0000000 | 4.8486124  | 0.1719850  |
| H | 0.0000000 | 5.8365038  | -0.3124813 |
| C | 0.0000000 | -4.8486124 | 0.1719850  |
| H | 0.0000000 | -5.8365038 | -0.3124813 |
| C | 0.0000000 | -4.7792457 | 1.5994386  |
| H | 0.0000000 | -5.7174549 | 2.1747440  |
| C | 0.0000000 | 0.0000000  | -3.9752746 |
| H | 0.0000000 | 0.0000000  | -5.0459225 |
| C | 0.0000000 | 0.0000000  | -2.7674940 |
| H | 0.0000000 | 0.0000000  | -1.6965727 |
| O | 0.0000000 | 3.8096255  | -0.5771300 |

|    |            |            |            |
|----|------------|------------|------------|
| O  | 0.0000000  | 3.6726824  | 2.2419903  |
| O  | 0.0000000  | -3.6726824 | 2.2419903  |
| O  | 0.0000000  | -3.8096255 | -0.5771300 |
| I  | -2.1241944 | 0.0000000  | 0.7160201  |
| I  | 2.1241944  | 0.0000000  | 0.7160201  |
| Hg | 0.0000000  | 1.8983482  | 0.7280654  |
| Hg | 0.0000000  | -1.8983482 | 0.7280654  |
